# Supplementary material for: Distinct interactions of eIF4A and eIF4E with RNA helicase Ded1 stimulate translation in vivo
Source: eLife. 2020 May 29;9:e58243. doi: 10.7554/eLife.58243 (PMC7343385; doi:10.7554/eLife.58243)
Supplement: Figure 9—figure supplement 1—source data 1. [file elife-58243-fig9-figsupp1-data1.xlsx]

## Sheet: Sheet1
Supplementary Figure 9- Source File
Supplementary Figure 9A
	Rates -Ded1 (min-1)
	Replicate 1	Replicate 2	Replicate 3
No Ded1	0.8529	0.95259	1.0458
WT Ded1	2.36105	2.98996	2.9057
Ded1-ΔNTD	3.0151	3.40938	3.18061
Ded1-21,51	2.289	2.4657	2.87024
Ded1-59	2.45999	2.8519	3.1559
Supplementary Figure 9B
	K1/2Ded1-variants (nM)
	Replicate 1	Replicate 2	Replicate 3
WT Ded1	58.705	49.349	64.725
Ded1-ΔNTD	3985.1	3707.5	3911.6
Ded1-21,51	425.81	342.44	444.73
Ded1-59	211.92	292.27	190.67
