# Supplementary material for: Distinct interactions of eIF4A and eIF4E with RNA helicase Ded1 stimulate translation in vivo
Source: eLife. 2020 May 29;9:e58243. doi: 10.7554/eLife.58243 (PMC7343385; doi:10.7554/eLife.58243)
Supplement: Figure 9—source data 1. [file elife-58243-fig9-data1.xlsx]

## Sheet: Sheet1
Figure 9- Source File
Figure 9A
	Rates -Ded1 (min-1)
	Replicate 1	Replicate 2	Replicate 3
No Ded1	0.18582	0.2827	0.27117
WT Ded1	1.07389	1.45772	1.29953
Ded1-ΔNTD	0.70131	0.70965	0.64095
Ded1-21,51	0.76576	0.82223	0.85325
Ded1-59	1.82249	1.69257	1.58527
Figure 9B
	K1/2Ded1-variants (nM)
	Replicate 1	Replicate 2	Replicate 3
WT Ded1	285.11	207.16	262.34
Ded1-ΔNTD	1878.2	1796.1	1990.5
Ded1-21,51	762.92	993.7	920.03
Ded1-59	1103	783.83	1122.2
